# Supplementary material for: Interpolation algorithm for asynchronous ADC-data
Source: Copernicus journal article supplement (doi:10.5194/ars-15-163-2017), 2017-09-21
Supplement: Supplementary file 1 [file ars-15-163-2017-supplement.zip]

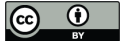

## *Supplement of* **Interpolation algorithm for asynchronous ADC-data**

**Stefan Bramburger et al.**

*Correspondence to:* Dirk Killat ([killat@tu-cottbus.de](mailto:killat@tu-cottbus.de)) and Stefan Bramburger ([stefan.bramburger@b-tu.de](mailto:stefan.bramburger@b-tu.de))

- [ars-15-163-2017-supplement-title-page.pdf](#)
- [Fig4\\_squarewave\\_50kHz.mat](#)
- [Fig5\\_4577Hz\\_sin.mat](#)
- [Fig8\\_sndr\\_91kHz.mat](#)
- [Fig9\\_noisy\\_sin\\_50kHz.mat](#)

The copyright of individual parts of the supplement might differ from the CC BY 3.0 License.
